# Supplementary material
Source: publisher site journal article supplement (http://content.karger.com/ProdukteDB/miscArchiv/000/272/458/000272458_sm_Supplementary_Table%201.pdf)
Supplement: Supplementary file 1 [file 000272458_sm_Supplementary_Table%201.pdf]

## SUPPLEMENTARY TABLE 1.

### List of BAC clones used in FISH experiments.

| Gene/marker symbol (synonyms) | Gene name                                                                 | BAC ID*    | Overgo probe**                 | GenBank, when available | Chicken chromosome (location, Mb) | Condor chromosome        | Stork chromosome |
|-------------------------------|---------------------------------------------------------------------------|------------|--------------------------------|-------------------------|-----------------------------------|--------------------------|------------------|
| CAPZA2                        | capping protein (actin filament) muscle Z-line, alpha 2                   | 20P14      | uprobe                         | AC183448                | 1 (26.68)                         | 1                        | n/a****          |
| CCT2                          | chaperonin containing TCP1, subunit 2 (beta)                              | 10P14      | <i>Gallus gallus</i>           |                         | 1 (37.39)                         | 1                        | n/a              |
| EMP1                          | epithelial membrane protein 1                                             | 29A3       | <i>Gallus gallus</i>           |                         | 1 (50.22)                         | 1                        | n/a              |
| CHUNK1                        | CHUNK-1 protein                                                           | 5D3        | <i>Gallus gallus</i>           |                         | 1 (63.11)                         | 1                        | n/a              |
| USP5                          | ubiquitin specific peptidase 5 (isopeptidase T)                           | 1D23       | <i>Gallus gallus</i>           |                         | 1 (80.43)                         | 1                        | n/a              |
| OCA2                          | oculocutaneous albinism II (pink-eye dilution homolog, mouse)             | 5D3; 21D8  | <i>Gallus gallus</i>           |                         | 1 (134.82)                        | 1                        | n/a              |
| WNT11                         | wingless-type MMTV integration site family, member 11                     | 2P2        | <i>Gallus gallus</i>           |                         | 1 (198.84)                        | 1                        | n/a              |
| ACVR2B                        | activin A receptor, type IIB                                              | 3A13       | <i>Gallus gallus</i>           |                         | 2 (5.68)                          | 2                        | n/a              |
| RARB                          | retinoic acid receptor, beta                                              | 37G11      | <i>Gallus gallus</i>           |                         | 2 (37.83)                         | 2                        | n/a              |
| NFX1                          | nuclear transcription factor, X-box binding 1                             | 30M16      | <i>Gallus gallus</i>           |                         | 2 (56.52)                         | no signal                | n/a              |
| EPB41L4B                      | erythrocyte membrane protein band 4.1 like 4B                             | 24C3       | <i>Gallus gallus</i>           |                         | 2 (86.70)                         | 2                        | n/a              |
| MOS                           | v-mos Moloney murine sarcoma viral oncogene homolog                       | 47O3       | <i>Gymnogyps californianus</i> |                         | 2 (114.90)                        | 2                        | n/a              |
| PENK                          | proenkephalin                                                             | 1L8        | <i>Gallus gallus</i>           |                         | 2 (115.07)                        | 2                        | n/a              |
| CA2                           | carbonic anhydrase II                                                     | 27N2       | <i>Gallus gallus</i>           |                         | 2 (127.60)                        | 2                        | n/a              |
| MYC                           | v-myc myelocytomatosis viral oncogene homolog (avian)                     | 46O10      | <i>Coragyps atratus</i>        |                         | 2 (145.39)                        | no signal                | n/a              |
| FYN                           | FYN oncogene related to SRC, FGR, YES                                     | 2P12       | <i>Gallus gallus</i>           |                         | 3 (68.61)                         | 3                        | n/a              |
| BMP5                          | bone morphogenetic protein 5                                              | 48L9       | <i>Gallus gallus</i>           |                         | 3 (90.16)                         | 3                        | n/a              |
| SUPT3H                        | suppressor of Ty 3 homolog (S. cerevisiae)                                | 13G5       | <i>Gallus gallus</i>           | AC171379                | 3 (112.01)                        | 3                        | n/a              |
| RUNX2                         | runt-related transcription factor 2                                       | 13G5       | <i>Gallus gallus</i>           | AC171379                | 3 (112.22)                        | 3                        | n/a              |
| ADL0143                       | STS (sequence tagged-site)                                                | 7C18*      | <i>Gallus gallus</i>           | CC223698,               | 4p (1.40)                         | no signal                | n/a              |
| ADL0255                       | STS                                                                       | 139H8*     | <i>Gallus gallus</i>           | CC223699,               | 4p (2.24)                         | no signal                | n/a              |
| BTK                           | Bruton agammaglobulinemia tyrosine kinase                                 | 1N8; 13M23 | <i>Gallus gallus</i>           | CC284373                | 4p (2.02)                         | 9; W repeat***           | n/a              |
| GCT0026                       | STS                                                                       | 133E20*    | <i>Gallus gallus</i>           | CC265640,               | 4p (2.15)                         | no signal                | n/a              |
| ADL0317                       | STS                                                                       | 103H4*     | <i>Gallus gallus</i>           | CC265641,               | 4p (3.46)                         | no signal                | n/a              |
| RRAGB (RRAGA)                 | Ras-related GTP binding B                                                 | 28F10      | <i>Gallus gallus</i>           | CC294981,               | 4p (11.57)                        | 9                        | n/a              |
| ADL0145                       | STS                                                                       | 7B16*      | <i>Gallus gallus</i>           | CC294982,               | 4q (17.90)                        | no signal                | n/a              |
| NPY2R                         | neuropeptide Y receptor Y2                                                | 2B24       | <i>Gallus gallus</i>           |                         | 4q (21.63)                        | 4; centromeric repeat*** | n/a              |
| FGF2                          | fibroblast growth factor 2 (basic)                                        | 2E13       | <i>Gallus gallus</i>           |                         | 4q (55.12)                        | 4                        | n/a              |
| FGFR3                         | fibroblast growth factor receptor 3                                       | 35K11      | <i>Gallus gallus</i>           |                         | 4q (86.43)                        | 4                        | n/a              |
| RAG1                          | recombination activating gene 1                                           | 5H14       | <i>Gallus gallus</i>           |                         | 5 (21.21)                         | 5                        | n/a              |
| LOC428877 (ZFP36L1, ROS0052)  | hypothetical LOC428877                                                    | 21F19      | <i>Gallus gallus</i>           |                         | 5 (30.64)                         | 5                        | n/a              |
| FOS                           | v-fos FBJ murine osteosarcoma viral oncogene homolog                      | 20L3       | <i>Gallus gallus</i>           |                         | 5 (40.63)                         | 5                        | n/a              |
| SPATA7                        | spermatogenesis associated 7                                              | 87L14      | uprobe                         | AC183451                | 5 (45.51)                         | 5                        | n/a              |
| DYNC1H1                       | dynein, cytoplasmic 1, heavy chain 1                                      | 27I22      | <i>Gallus gallus</i>           |                         | 5 (51.97)                         | 5                        | n/a              |
| BMP4                          | bone morphogenetic protein 4                                              | 30F7       | <i>Gallus gallus</i>           |                         | 5 (61.15)                         | 5                        | n/a              |
| SUPV3L1                       | suppressor of vart1, 3-like 1 (S. cerevisiae)                             | 37H15      | <i>Gallus gallus</i>           |                         | 6 (11.94)                         | 6                        | n/a              |
| CYP17A1                       | cytochrome P450, family 17, subfamily A, polypeptide 1                    | 24J23      | <i>Gallus gallus</i>           |                         | 6 (24.82)                         | 6                        | n/a              |
| CD28                          | CD28 molecule                                                             | 34P13      | <i>Gallus gallus</i>           |                         | 7 (14.53)                         | 7                        | n/a              |
| NRD1                          | nardilysin (N-arginine dibasic)                                           | 27F12      | <i>Gallus gallus</i>           |                         | 8 (24.92)                         | 8                        | n/a              |
| Gga.1829                      | finished cDNA, clone ChEST296i7                                           | 47P2       | <i>Gymnogyps californianus</i> |                         | 9 (6.53)                          | 10                       | n/a              |
| PER2                          | period homolog 2 ( <i>Drosophila</i> )                                    | 47P2       | <i>Cathartes melambrotus</i>   |                         | 9 (6.55)                          | 10                       | n/a              |
| SEC11L1                       | SEC11 homolog A ( <i>S. cerevisiae</i> )                                  | 31B11      | <i>Gallus gallus</i>           |                         | 10 (0.37)                         | no signal                | n/a              |
| CHRN4                         | cholinergic receptor, nicotinic, beta 4                                   | 6A6        | <i>Gallus gallus</i>           |                         | 10 (4.55)                         | 11                       | n/a              |
| ACAN (AGC1)                   | aggrecan                                                                  | 21P20      | <i>Gallus gallus</i>           | AC171743                | 10 (14.78)                        | 11                       | n/a              |
| RPL4                          | ribosomal protein L4                                                      | 35A6       | <i>Gallus gallus</i>           |                         | 10 (20.67)                        | 11                       | n/a              |
| RAF1                          | v-raf-1 murine leukemia viral oncogene homolog 1                          | 21I7       | <i>Gallus gallus</i>           |                         | 12 (5.18)                         | 13                       | n/a              |
| NINJ1                         | ninjurin 1                                                                | 44N15      | <i>Gallus gallus</i>           |                         | 12 (6.84)                         | 13                       | n/a              |
| OVM                           | ovomucoid                                                                 | 5J24       | <i>Gallus gallus</i>           |                         | 13 (10.63)                        | 14                       | n/a              |
| NR3C1                         | nuclear receptor subfamily 3, group C, member 1 (glucocorticoid receptor) | 29N19      | <i>Gallus gallus</i>           |                         | 13 (17.99)                        | 14                       | n/a              |
| ALDH2                         | aldehyde dehydrogenase 2 family (mitochondrial)                           | 46P15      | <i>Gallus gallus</i>           |                         | 15 (6.26)                         | 16                       | n/a              |
| DBC1                          | deleted in bladder cancer 1                                               | 14E23      | <i>Gallus gallus</i>           |                         | 17 (4.60)                         | 18                       | n/a              |
| FBXW2                         | F-box and WD repeat domain containing 2                                   | 21C14      | <i>Gallus gallus</i>           |                         | 17 (11.11)                        | 18                       | n/a              |
| AANAT                         | arylalkylamine N-acetyltransferase                                        | 22G13      | <i>Cathartes melambrotus</i>   |                         | 18 (4.37)                         | 19                       | n/a              |
| MYBBP1A                       | MYB binding protein (P160) 1a                                             | 24E3       | <i>Gallus gallus</i>           |                         | 19 (2.90)                         | 20                       | n/a              |
| AGRN                          | agrin                                                                     | 18N4       | <i>Gallus gallus</i>           |                         | 21 (2.75)                         | no signal                | n/a              |

| Gene/marker symbol (synonyms) | Gene name                                                                                                                                                           | BAC ID* | Overgo probe**             | GenBank, when available | Chicken chromosome (location, Mb) | Condor chromosome   | Stork chromosome |  |
|-------------------------------|---------------------------------------------------------------------------------------------------------------------------------------------------------------------|---------|----------------------------|-------------------------|-----------------------------------|---------------------|------------------|--|
| PRNP                          | prion protein (p27-30) (Creutzfeldt-Jakob disease, Gerstmann-Strausler-Scheinker syndrome, fatal familial insomnia)                                                 | 42C20   | <i>Vultur gryphus</i>      |                         | 22 (0.44)                         | 23                  | n/a              |  |
| TRIM29                        | tripartite motif-containing 29                                                                                                                                      | 38C1    | <i>Gallus gallus</i>       |                         | 24 (4.11)                         | 25                  | n/a              |  |
| PAFAH1B2                      | platelet-activating factor acetylhydrolase, isoform b, beta subunit 30kDa                                                                                           | 43E17   | <i>Gallus gallus</i>       |                         | 24 (5.33)                         | 25                  | n/a              |  |
| TAGLN                         | transgelin                                                                                                                                                          | 43E17   | <i>Gallus gallus</i>       |                         | 24 (5.35)                         | 25                  | n/a              |  |
| WNT2B                         | wingless-type MMTV integration site family, member 2B                                                                                                               | 181F1   | uprobe                     | AC183845                | 26 (3.32)                         | 27                  | n/a              |  |
| ACCN1                         | amiloride-sensitive cation channel 1, neuronal (degenerin)                                                                                                          | 41I0    | <i>Gallus gallus</i>       |                         | 27 (1.68)                         | 28; W repeat        | n/a              |  |
| UBE2R2 / LOC427134            | ubiquitin-conjugating enzyme E2R 2 / hypothetical LOC427134                                                                                                         | 37I12   | <i>Gallus gallus</i>       |                         | Z (6.87)/ W (0.12)                | Z; no signal on W   | Z                |  |
| WDR40A                        | WD repeat domain 40A                                                                                                                                                | 38O23   | <i>Gallus gallus</i>       |                         | Z (7.02)                          | no signal           | no signal        |  |
| UBAP1                         | ubiquitin associated protein 1                                                                                                                                      | 38O23   | <i>Gallus gallus</i>       |                         | Z (7.05)                          | no signal           | no signal        |  |
| CNTRF                         | ciliary neurotrophic factor receptor                                                                                                                                | 47L2    | <i>Gallus gallus</i>       |                         | Z (7.77)                          | no signal; W repeat | no signal        |  |
| SUB1                          | SUB1 homolog ( <i>S. cerevisiae</i> )                                                                                                                               | 30H6    | <i>Taeniopygia guttata</i> |                         | Z (9.16)                          | Z                   | Z                |  |
| MCW0331                       | STS                                                                                                                                                                 | 10B15   | <i>Gallus gallus</i>       |                         | Z (12.06)                         | no signal           | no signal        |  |
| OXCT1                         | 3-oxoacid CoA transferase 1                                                                                                                                         | 46B5    | <i>Taeniopygia guttata</i> |                         | Z (12.63)                         | Z                   | no signal        |  |
| MOCS2                         | molybdenum cofactor synthesis 2                                                                                                                                     | 1J17    | <i>Taeniopygia guttata</i> |                         | Z (15.25)                         | Z                   | no signal        |  |
| FST                           | folistatin                                                                                                                                                          | 1J17    | <i>Taeniopygia guttata</i> |                         | Z (15.40)                         | Z                   | no signal        |  |
| PLK2                          | polo-like kinase 2 ( <i>Drosophila</i> )                                                                                                                            | 20J21   | <i>Taeniopygia guttata</i> |                         | Z (17.39)                         | Z                   | Z                |  |
| TINP1                         | TGF beta-inducible nuclear protein 1                                                                                                                                | 2P19    | <i>Taeniopygia guttata</i> |                         | Z (23.68)                         | Z                   | Z                |  |
| PGM5                          | phosphoglucomutase 5                                                                                                                                                | 26J20   | <i>Gallus gallus</i>       |                         | Z (26.40)                         | Z                   | Z                |  |
| PGM5                          | phosphoglucomutase 5                                                                                                                                                | 32A7    | <i>Gallus gallus</i>       |                         | Z (26.40)                         | Z                   | Z                |  |
| RCJMB04_13c10 (CBWD1)         | COBW domain containing 1                                                                                                                                            | 32A7    | <i>Taeniopygia guttata</i> |                         | Z (26.49)                         | Z                   | Z                |  |
| SMARCA2                       | SWI/SNF related, matrix associated, actin dependent regulator of chromatin, subfamily a, member 2                                                                   | 11H4    | <i>Taeniopygia guttata</i> |                         | Z (27.21)                         | Z                   | Z                |  |
| KIAA1432                      | KIAA1432                                                                                                                                                            | 35C5    | <i>Taeniopygia guttata</i> |                         | Z (28.29)                         | no signal           | no signal        |  |
| KIAA1432                      | KIAA1432                                                                                                                                                            | 19E4    | <i>Taeniopygia guttata</i> |                         | Z (28.29)                         | Z; W repeat         | no signal        |  |
| LOC427229                     | hypothetical LOC427229                                                                                                                                              | 19E4    | <i>Taeniopygia guttata</i> |                         | Z (28.42)                         | Z; W repeat         | no signal        |  |
| UHRF2                         | ubiquitin-like, containing PHD and RING finger domains, 2                                                                                                           | 6C12    | <i>Taeniopygia guttata</i> |                         | Z (28.55)                         | Z                   | Z                |  |
| JMJ2C                         | jumonji domain containing 2C                                                                                                                                        | 32H13   | <i>Gallus gallus</i>       |                         | Z (28.66)                         | no signal           | no signal        |  |
| JMJ2C                         | jumonji domain containing 2C                                                                                                                                        | 8M13*   | <i>Gallus gallus</i>       | CC267602-CC267604       | Z (28.66)                         | no signal           | no signal        |  |
| NFIB                          | nuclear factor I/B                                                                                                                                                  | 21B22   | <i>Gallus gallus</i>       |                         | Z (31.23)                         | no signal           | no signal        |  |
| DENND4C                       | DENN/MADD domain containing 4C                                                                                                                                      | 10J11   | <i>Taeniopygia guttata</i> |                         | Z (33.48)                         | Z                   | Z                |  |
| SLC24A2                       | solute carrier family 24 (sodium/potassium/calcium exchanger), member 2                                                                                             | 10J11   | <i>Taeniopygia guttata</i> |                         | Z (33.60)                         | Z                   | Z                |  |
| ZFAND5 (ZA20D2)               | zinc finger, AN1-type domain 5                                                                                                                                      | 36P6    | <i>Gallus gallus</i>       |                         | Z (35.44)                         | no signal; W repeat | no signal        |  |
| PCSK5                         | proprotein convertase subtilisin/kexin type 5                                                                                                                       | 26N1    | <i>Gallus gallus</i>       |                         | Z (36.79)                         | Z                   | no signal        |  |
| UBQLN1                        | ubiquilin 1                                                                                                                                                         | 22P14   | <i>Gallus gallus</i>       |                         | Z (39.46)                         | no signal           | no signal        |  |
| HABP4                         | hyaluronan binding protein 4                                                                                                                                        | 33G4    | <i>Gallus gallus</i>       |                         | Z (41.70)                         | Z                   | no signal        |  |
| CDC14B                        | CDC14 cell division cycle 14 homolog C ( <i>S. cerevisiae</i> )                                                                                                     | 33G4    | <i>Gallus gallus</i>       |                         | Z (41.76)                         | Z                   | no signal        |  |
| RCJMB04_3e14 (LOC427269)      | similar to Auh protein                                                                                                                                              | 2A6     | <i>Gallus gallus</i>       |                         | Z (43.58)                         | no signal           | no signal        |  |
| RCJMB04_3e14 (LOC427269)      | similar to Auh protein                                                                                                                                              | 15H17   | <i>Gallus gallus</i>       |                         | Z (43.58)                         | Z; W repeat         | no signal        |  |
| ST8SIA4                       | ST8 alpha-N-acetylneuraminidase 2,8-sialyltransferase 4                                                                                                             | 2J3     | <i>Taeniopygia guttata</i> |                         | Z (49.65)                         | Z                   | no signal        |  |
| TMEM175                       | transmembrane protein 175                                                                                                                                           | 19L5    | <i>Taeniopygia guttata</i> |                         | Z (52.36)                         | Z                   | no signal        |  |
| TAL2                          | T-cell acute lymphocytic leukemia 2                                                                                                                                 | 3O23    | <i>Gallus gallus</i>       |                         | Z (53.97)                         | Z                   | Z                |  |
| TMEM167                       | transmembrane protein 167                                                                                                                                           | 1I22    | <i>Taeniopygia guttata</i> |                         | Z (61.63)                         | Z                   | Z                |  |
| CCDC125                       | coiled-coil domain containing 125                                                                                                                                   | 47D5    | <i>Taeniopygia guttata</i> |                         | Z (62.77)                         | Z; W repeat         | Z                |  |
| PALM2 (PALM2-AKAP2)           | paralemmin 2                                                                                                                                                        | 42P15   | <i>Gallus gallus</i>       |                         | Z (64.38)                         | Z                   | Z                |  |
| TXN                           | thioredoxin                                                                                                                                                         | 19K1    | <i>Gallus gallus</i>       |                         | Z (65.07)                         | Z                   | Z                |  |
| RCJMB04_17o18 (IKBKAP)        | inhibitor of kappa light polypeptide gene enhancer in B-cells, kinase complex-associated protein                                                                    | 2G3     | <i>Gallus gallus</i>       |                         | Z (68.64)                         | no signal           | no signal        |  |
| LOC427367 (IFT74)             | similar to Intraflagellar transport 74 homolog (Coiled-coil domain-containing protein 2) (Capillary morphogenesis synuclein, alpha interacting protein (synphilin)) | 40B12   | <i>Gallus gallus</i>       |                         | Z (66.84)                         | Z                   | no signal        |  |
| SNCAIP                        | synphilin                                                                                                                                                           | 184F6   | uprobe                     | AC183846                | Z (73.74)                         | Z                   | Z                |  |

| Gene/marker symbol (synonyms) | Gene name | BAC ID* | Overgo probe** | GenBank, when available | Chicken chromosome (location, Mb) | Condor chromosome | Stork chromosome |
|-------------------------------|-----------|---------|----------------|-------------------------|-----------------------------------|-------------------|------------------|
|-------------------------------|-----------|---------|----------------|-------------------------|-----------------------------------|-------------------|------------------|

\* Clones from chicken BAC library (CHORI-261), all others from condor BAC library (CHORI-262).

\*\* BACs were captured during library screen with overgos designed from chicken (*Gallus gallus*), California condor (*Gymnogyps californianus*), zebra finch (*Taeniopygia guttata*), or other New World vulture (*Coragyps atratus*, *Cathartes melambrotus*, and *Vultur gryphus*) genomic sequences. Uprobes were universal probes derived from conserved regions across various species (Kellner et al. 2005; Romanov et al. 2009).

\*\*\* The hybridization patterns of two families of uncharacterized repetitive sequences were observed (see Fig. 1b).

\*\*\*\* n/a denotes FISH not attempted.
